# Supplementary material for: Mbd2 Mediates Retinal Cell Apoptosis by Targeting the lncRNA Mbd2-AL1/miR-188-3p/Traf3 Axis in Ischemia/Reperfusion Injury
Source: PubMed Central journal article supplement — Mol Ther Nucleic Acids. 2020 Jan 18;19:1250–65. doi: 10.1016/j.omtn.2020.01.011 (PMC7025978; doi:10.1016/j.omtn.2020.01.011), 2020-01-18
Supplement: mmc1.pdf [file mmc1.pdf]

OMTN, Volume 19

## **Supplemental Information**

### **Mbd2 Mediates Retinal Cell Apoptosis by Targeting the lncRNA Mbd2-AL1/miR-188-3p/Traf3 Axis in Ischemia/Reperfusion Injury**

**Yanni Ge, Ran Zhang, Yuqing Feng, and Huiling Li**

**Mbd2 mediates retinal cell apoptosis by targeting the lncRNA Mbd2-AL1/miR-188-3p/Traf3 axis in ischemia/reperfusion injury**

Yanni Ge, Ran Zhang, Yuqing Feng, Huiling Li

**Supplementary Table 1. upregulated lncRNAs in Scramble/I/R group vs. Scramble group**

| <b>upregulated lncRNAs in Scramble/I/R group vs. Scramble group</b> |                    |                    |
|---------------------------------------------------------------------|--------------------|--------------------|
| ENSMUST00000163697                                                  | ENSMUST00000180630 | ENSMUST00000125004 |
| ENSMUST00000123078                                                  | uc.129-            | ENSMUST00000149283 |
| AK039484                                                            | ENSMUST00000154204 | ENSMUST00000138771 |
| ENSMUST00000181828                                                  | AK051538           | ENSMUST00000141071 |
| ENSMUST00000136537                                                  | AK048741           | mouseLincRNA0767+  |
| ENSMUST00000145757                                                  | ENSMUST00000124091 | ENSMUST00000130983 |
| NR_040420                                                           | ENSMUST00000160677 | AK048998           |
| AK138545                                                            | ENSMUST00000135399 | mouseLincRNA0543-  |
| ENSMUST00000171450                                                  | TCONS_00012085     | ENSMUST00000140873 |
| uc009ljz.1                                                          | AK020950           | uc008eew.1         |
| ENSMUST00000149302                                                  | ENSMUST00000146069 | ENSMUST00000173538 |
| humanLincRNA0561-                                                   | AK003980           | AK016924           |
| uc007clk.1                                                          | uc.64+             | ENSMUST00000147045 |
| ENSMUST00000149054                                                  | uc029soj.1         | ENSMUST00000099260 |
| ENSMUST00000141528                                                  | AK144529           | ENSMUST00000162149 |
| uc.252-                                                             | AK081864           | ENSMUST00000133880 |
| AK155686                                                            | ENSMUST00000169387 | ENSMUST00000127429 |
| AK142692                                                            | uc009hik.1         | ENSMUST00000140754 |
| AK134910                                                            | ENSMUST00000124653 | AK046972           |
| AK154589                                                            | AK082284           | NR_028263          |
| uc.34-                                                              | ENSMUST00000125409 | uc009dqv.1         |
| AK032419                                                            | ENSMUST00000142248 | ENSMUST00000181830 |
| humanLincRNA1945-                                                   | uc.19-             | ENSMUST00000152860 |
| ENSMUST00000129027                                                  | ENSMUST00000135495 | ENSMUST00000160516 |
| ENSMUST00000129502                                                  | ENSMUST00000174338 | AK086566           |
| AK140140                                                            | ENSMUST00000099647 | ENSMUST00000143806 |
| ENSMUST00000120404                                                  | ENSMUST00000149030 | NR_102293          |
| uc.250-                                                             | ENSMUST00000161623 | uc007ees.1         |
| AK139938                                                            | uc007ihz.1         | ENSMUST00000131987 |
| NR_033526                                                           | uc029rkv.1         | ENSMUST00000139847 |
| AK040434                                                            | ENSMUST00000130883 | ENSMUST00000125867 |
| ENSMUST00000129096                                                  | AK039081           | ENSMUST00000133539 |
| uc009euf.1                                                          | AK079872           | ENSMUST00000124624 |
| ENSMUST00000146327                                                  | uc.426-            | ENSMUST00000152779 |
| ENSMUST00000176431                                                  | ENSMUST00000167053 | TCONS_00025263     |

|                    |                    |                    |
|--------------------|--------------------|--------------------|
| AK003907           | ENSMUST00000142818 | uc009avw.1         |
| ENSMUST00000139786 | ENSMUST00000156701 | ENSMUST00000180544 |
| AK132438           | AK139467           | ENSMUST00000137683 |
| mouseLincRNA1097-  | ENSMUST00000177480 | AK030568           |
| AK030243           | ENSMUST00000180982 | NR_040746          |
| humanLincRNA0635+  | ENSMUST00000143129 | ENSMUST00000137043 |
| AK144133           | TCONS_00015979     | TCONS_00015184     |
| ENSMUST00000159153 | AK156905           | ENSMUST00000180757 |
| ENSMUST00000119517 | ENSMUST00000120603 | ENSMUST00000176773 |
| TCONS_00036126     | humanLincRNA0194+  | ENSMUST00000159700 |
| AK157120           | AK047632           | AK085151           |
| ENSMUST00000149420 | uc.461+            | ENSMUST00000161664 |
| ENSMUST00000149692 | ENSMUST00000169214 | ENSMUST00000123946 |
| ENSMUST00000180460 | ENSMUST00000159117 | ENSMUST00000051531 |
| uc012fvb.1         | ENSMUST00000127068 | ENSMUST00000065709 |
| ENSMUST00000126912 | AK032249           | ENSMUST00000110954 |
| AK047380           | ENSMUST00000171273 | ENSMUST00000026264 |
| ENSMUST00000126846 | AK033143           | ENSMUST00000151023 |
| AK009126           | mouseLincRNA1098+  | ENSMUST00000147329 |
| AK140706           | uc.247+            | ENSMUST00000153000 |
| ENSMUST00000159399 | AK042899           | uc007ktl.1         |
| ENSMUST00000135931 | ENSMUST00000135601 | AK148890           |
| AK043360           | AK020372           | ENSMUST00000134755 |
| ENSMUST00000163665 | humanLincRNA0650-  | ENSMUST00000140514 |
| ENSMUST00000155086 | ENSMUST00000159037 | NR_045176          |
| ENSMUST00000154578 | uc.367+            | ENSMUST00000181302 |
| AK020279           | ENSMUST00000153863 | AK040345           |
| ENSMUST00000176131 | ENSMUST00000181514 | humanLincRNA1605+  |
| uc.77-             | ENSMUST00000167073 | uc007pkb.2         |
| NR_045542          | AK142125           | uc009dml.1         |
| AK046984           | ENSMUST00000163081 | ENSMUST00000155728 |
| AK052120           | ENSMUST00000144793 | uc.74-             |
| ENSMUST00000137375 | AK089653           | AK143399           |
| ENSMUST00000132787 | mouseLincRNA1511-  | AK034976           |
| ENSMUST00000180819 | AK157323           | ENSMUST00000133112 |
| AK041489           | CF616316           | ENSMUST00000143340 |
| ENSMUST00000154896 | TCONS_00034053     | AK015830           |
| AK018645           | NR_029382          | NR_030675          |
| NR_015467          | uc007rvk.1         | ENSMUST00000122109 |
| ENSMUST00000148857 | AK054326           | ENSMUST00000160470 |
| AK089422           | ENSMUST00000133365 | ENSMUST00000162801 |
| ENSMUST00000107148 | NR_045640          | ENSMUST00000156295 |

|                    |                    |                    |
|--------------------|--------------------|--------------------|
| uc007baf.1         | AK156102           | ENSMUST00000172812 |
| ENSMUST00000159157 | ENSMUST00000142932 | ENSMUST00000174520 |
| ENSMUST00000149805 | ENSMUST00000173251 | uc029sug.1         |
| ENSMUST00000147861 | AK040898           | AK045182           |
| ENSMUST00000151257 | ENSMUST00000132434 | ENSMUST00000145421 |
| uc007zgf.1         | AK047864           | uc008elz.1         |
| AK052777           | ENSMUST00000130038 | AK081208           |
| TCONS_00013499     | ENSMUST00000152600 | uc007txt.1         |
| AK142735           | AK039385           | ENSMUST00000139702 |
| AK148874           | ENSMUST00000147654 | AK028736           |
| TCONS_00003993     | AK020425           | ENSMUST00000125424 |
| ENSMUST00000159393 | ENSMUST00000156145 | ENSMUST00000118822 |
| AK037099           | ENSMUST00000160159 | TCONS_00009802     |
| TCONS_00006732     | ENSMUST00000136126 | ENSMUST00000127318 |
| ENSMUST00000181422 | ENSMUST00000145728 | AK035280           |
| ENSMUST00000136610 | AK037210           | AK013121           |
| uc029wtn.1         | uc029xdn.1         | uc007sgd.1         |
| ENSMUST00000177445 | AK031651           | ENSMUST00000163608 |
| uc009ril.1         | BY573946           | AK016790           |
| ENSMUST00000125326 | NR_015610          | AK153797           |
| ENSMUST00000144231 | ENSMUST00000155767 | uc.335+            |
| AK140170           | ENSMUST00000140461 | ENSMUST00000067521 |
| AK045044           | uc.276+            | NR_040295          |
| ENSMUST00000120786 | AK153393           | AK085385           |
| ENSMUST00000146281 | uc012gti.1         | ENSMUST00000143841 |
| AK049728           | humanlincRNA0518+  | AK082454           |
| TCONS_00025329     | ENSMUST00000139607 | AK038145           |
| ENSMUST00000151412 | ENSMUST00000124559 | AK045073           |
| ENSMUST00000151582 | ENSMUST00000141336 | ENSMUST00000155423 |
| ENSMUST00000140602 | ENSMUST00000162912 | AK043671           |
| AK155038           | TCONS_00009665     | AK132396           |
| AK079498           | humanlincRNA0043+  | uc007dlv.1         |
| AK133451           | uc007ssb.1         | AK043028           |
| ENSMUST00000161580 | uc008hdz.1         | ENSMUST00000181387 |
| AK089789           | ENSMUST00000123262 | AK142149           |
| AK020824           | ENSMUST00000154706 | uc011zox.1         |
| ENSMUST00000130441 | AK077872           | uc007ydb.1         |
| ENSMUST00000128766 | ENSMUST00000161769 | humanlincRNA1178+  |
| ENSMUST00000180281 | ENSMUST00000122281 | ENSMUST00000180377 |
| AK140232           | ENSMUST00000140487 | ENSMUST00000149117 |
| uc007dtm.1         | AK142657           | ENSMUST00000118579 |
| ENSMUST00000118575 | AK052802           | AK135681           |

|                    |                    |                    |
|--------------------|--------------------|--------------------|
| ENSMUST00000157701 | AK037904           | NR_027952          |
| ENSMUST00000156396 | ENSMUST00000144292 | AK052126           |
| ENSMUST00000129240 | AK142890           | uc009fbu.1         |
| ENSMUST00000143025 | ENSMUST00000162289 | ENSMUST00000126627 |
| humanlincRNA0933+  | NR_039577          | TCONS_00002220     |
| ENSMUST00000155715 | ENSMUST00000155761 | ENSMUST00000137546 |
| AK132891           | ENSMUST00000154759 | ENSMUST00000149299 |
| ENSMUST00000132481 | ENSMUST00000161304 | ENSMUST00000156814 |
| ENSMUST00000117697 | 2_00008059         | ENSMUST00000181427 |
| ENSMUST00000129374 | NR_046233          | AK018099           |
| ENSMUST00000126446 | humanlincRNA1907-  | ENSMUST00000151468 |
| ENSMUST00000148298 | uc.275-            | BM938732           |
| AK037460           | uc.195-            | AK157381           |
| AI390166           | mouselincRNA0538-  | AK144955           |
| AK085893           | ENSMUST00000150545 | AK007047           |
| uc.481-            | ENSMUST00000156882 | uc007qnc.1         |
| ENSMUST00000176215 | uc012coq.1         | ENSMUST00000152911 |
| ENSMUST00000181178 | ENSMUST00000180919 | AK133460           |
| ENSMUST00000140231 | AK016451           | AK048415           |
| ENSMUST00000144696 | ENSMUST00000129260 |                    |

**Supplementary Table 2. downregulated lncRNAs in MBD2 siRNA group**

| <b>downregulated lncRNAs in MBD2 siRNA group</b> |                    |                    |
|--------------------------------------------------|--------------------|--------------------|
| ENSMUST00000177480                               | AK154589           | ENSMUST00000099260 |
| AK156905                                         | AK052120           | ENSMUST00000151412 |
| AK016451                                         | ENSMUST00000124091 | ENSMUST00000122281 |
| AK132396                                         | ENSMUST00000162912 | AK140140           |
| AK156905                                         | AK154589           | ENSMUST00000180757 |
| ENSMUST00000147654                               | uc029sug.1         | AK140140           |
| uc.247+                                          | AK037904           | ENSMUST00000137375 |
| uc007zgf.1                                       | ENSMUST00000137043 | AK028736           |
| ENSMUST00000135495                               | NR_033526          | ENSMUST00000163697 |
| NR_046233                                        | ENSMUST00000151023 | AK153393           |
| TCONS_00002220                                   | ENSMUST00000130883 | ENSMUST00000163697 |
| AK020372                                         | AK132891           | ENSMUST00000145728 |
| ENSMUST00000154706                               | NR_033526          | ENSMUST00000133880 |
| AK018099                                         | NR_045176          | TCONS_00003993     |
| TCONS_00006732                                   | ENSMUST00000156701 | ENSMUST00000119517 |
| ENSMUST00000150545                               | ENSMUST00000120404 | uc009hik.1         |
| ENSMUST00000149299                               | AK054326           | humanlincRNA0194+  |
| ENSMUST00000142932                               | TCONS_00012085     | ENSMUST00000140873 |

|                    |                    |                    |
|--------------------|--------------------|--------------------|
| mouselincRNA0543-  | AK133460           | uc011zox.1         |
| NR_040295          | ENSMUST00000120404 | uc007baf.1         |
| ENSMUST00000118579 | ENSMUST00000143806 | ENSMUST00000180377 |
| AK030243           | TCONS_00025263     | ENSMUST00000149117 |
| NR_045640          | ENSMUST00000181178 | ENSMUST00000138771 |
| ENSMUST00000163608 | uc007ydb.1         | uc012gti.1         |
| AK135681           | ENSMUST00000140461 | NR_015467          |
| ENSMUST00000129027 | AK037460           | AK155686           |
| ENSMUST00000174520 | ENSMUST00000067521 | AK038145           |
| ENSMUST00000144292 | NR_039577          | AK155686           |
| AK081208           | ENSMUST00000173538 | mouselincRNA0767+  |
| uc.276+            | ENSMUST00000156396 | AK018645           |
| AK144529           | ENSMUST00000124624 | ENSMUST00000149054 |
| uc.426-            | ENSMUST00000148857 | ENSMUST00000132481 |
| ENSMUST00000180919 | ENSMUST00000129096 | ENSMUST00000180982 |
| AK077872           | ENSMUST00000136610 | ENSMUST00000149054 |
| BM938732           | ENSMUST00000144231 | ENSMUST00000149805 |
| uc009fbu.1         | uc009ril.1         | BY573946           |
| AK047632           | ENSMUST00000129096 | ENSMUST00000123078 |
| ENSMUST00000155423 | ENSMUST00000133112 | ENSMUST00000144793 |
| uc.335+            | ENSMUST00000159117 | AK042899           |
| NR_102293          | AK052126           | AK047864           |
| uc008hdz.1         | AK007047           | ENSMUST00000151582 |
| ENSMUST00000172812 | ENSMUST00000099260 | ENSMUST00000132434 |
| ENSMUST00000151412 | ENSMUST00000135931 | AK052777           |
| ENSMUST00000136126 | AK037210           | uc009euf.1         |
| ENSMUST00000128766 | AK051538           | ENSMUST00000181514 |
| ENSMUST00000180281 | ENSMUST00000137683 | ENSMUST00000130983 |
| ENSMUST00000156882 | ENSMUST00000148298 | uc.275-            |
| ENSMUST00000143025 | ENSMUST00000126627 | uc009euf.1         |
| ENSMUST00000135399 | mouselincRNA1097-  | NR_030675          |
| AK082454           | ENSMUST00000129502 | ENSMUST00000149692 |
| AK013121           | AK140706           | ENSMUST00000154578 |
| AK048998           | AK020824           | ENSMUST00000181387 |
| ENSMUST00000153863 | AK134910           | AK140170           |
| ENSMUST00000143340 | ENSMUST00000129502 | uc029xdn.1         |
| ENSMUST00000160470 | AK140232           | uc.64+             |
| ENSMUST00000139607 | ENSMUST00000181427 | uc007ees.1         |
| AK089653           | ENSMUST00000125004 | uc.367+            |
| AK045182           | NR_040746          | ENSMUST00000136537 |
| ENSMUST00000026264 | ENSMUST00000143129 | ENSMUST00000156701 |
| ENSMUST00000141336 | AK039484           | ENSMUST00000147045 |

|                    |                    |                    |
|--------------------|--------------------|--------------------|
| ENSMUST00000051531 | AK142692           | humanlincRNA0561-  |
| ENSMUST00000126446 | ENSMUST00000140514 | ENSMUST00000161580 |
| uc.195-            | NR_028263          | AK144133           |
| AK020950           | AK039484           | AK030568           |
| ENSMUST00000181828 | AK142692           | humanlincRNA0561-  |
| ENSMUST00000155715 | AK086566           | ENSMUST00000129240 |
| CF616316           | ENSMUST00000162149 | ENSMUST00000127429 |
| AK043671           | ENSMUST00000151468 | ENSMUST00000149302 |
| ENSMUST00000137546 | AK034976           | ENSMUST00000149302 |
| ENSMUST00000123262 | ENSMUST00000155728 | NR_040420          |
| AK043028           | ENSMUST00000163665 | ENSMUST00000181830 |
| uc007rvk.1         | AK031651           | ENSMUST00000149302 |
| ENSMUST00000150545 | TCONS_00009802     | ENSMUST00000147861 |
| ENSMUST00000125326 | ENSMUST00000110954 | uc007ssb.1         |
| ENSMUST00000156814 | ENSMUST00000123946 | AK016924           |
| humanlincRNA1605+  | AK039385           | AK040434           |
| TCONS_00015184     | AK003980           | AK039081           |
| uc.481-            | ENSMUST00000180630 | AK046984           |
| AK143399           | ENSMUST00000129374 | ENSMUST00000153000 |
| ENSMUST00000176773 | humanlincRNA0650-  | ENSMUST00000127068 |
| AK133451           | ENSMUST00000135601 | AK142657           |
| uc009ljz.1         | AK079872           | TCONS_00034053     |
| uc012coq.1         | ENSMUST00000149283 | ENSMUST00000145421 |
| ENSMUST00000117697 | ENSMUST00000099647 | NR_015610          |
| mouselincRNA1098+  | TCONS_00015979     | NR_045542          |
| AK132438           | ENSMUST00000107148 | ENSMUST00000169387 |
| ENSMUST00000147329 | AK020279           | ENSMUST00000140231 |
| ENSMUST00000140602 | AK049728           | uc.252-            |
| AK016790           | ENSMUST00000126846 | ENSMUST00000167073 |
| ENSMUST00000161304 | ENSMUST00000176131 | ENSMUST00000157701 |
| AK139467           | ENSMUST00000155761 | AK037099           |
| uc029wtn.1         | ENSMUST00000129260 | uc007txt.1         |
| humanlincRNA1178+  | AK079498           | AK032419           |
| mouselincRNA1511-  | ENSMUST00000127318 | uc008eew.1         |
| ENSMUST00000142818 | AK081864           | ENSMUST00000133365 |
| AK032249           | uc007ktl.1         | AK041489           |
| ENSMUST00000146327 | ENSMUST00000146281 | AI390166           |
| AK089789           | AK142735           | ENSMUST00000176431 |
| NR_027952          | ENSMUST00000144696 | AK082284           |
| humanlincRNA0043+  | ENSMUST00000118575 | ENSMUST00000132787 |
| ENSMUST00000145757 | uc012fvb.1         | ENSMUST00000130038 |
| ENSMUST00000154204 | AK144955           | AK040345           |

|                    |                    |            |
|--------------------|--------------------|------------|
| ENSMUST00000167053 | ENSMUST00000136537 | AK142890   |
| AK148890           | ENSMUST00000159700 | AK156102   |
| AK085385           | AK048415           | uc008elz.1 |

**Supplementary Table 3 primers of genes**

| <b>Gene name</b> | <b>Forward primer(5'to3')</b>             | <b>Reverse primer(5'to3')</b>     | <b>RT primer(5'to3')</b>                                                 |
|------------------|-------------------------------------------|-----------------------------------|--------------------------------------------------------------------------|
| LncRNA Mbd2-AL1  | AACTTGA<br>AATCCCTCCTGTG<br>CT            | AGGCTTCAGTTCC<br>AAACACTC         |                                                                          |
| miR-188-3p       | CTCCCACATGCAG<br>GGT                      | CAGTGC<br>GTGTCGTGGAGT            | GTCGTATCCAGTG<br>CGTGTCGTGGAGT<br>CGGCAATTGCACT<br>GGATACGACTGCA<br>AACC |
| Traf3            | TCCAATTCCTAA<br>CCGCACC                   | GACCTGGGCTTGT<br>AACCTCC          |                                                                          |
| GAPDH            | CAA<br>GGTCATCCATGAC<br>AACTTTG           | GTCCACCACCCTG<br>TTGCTG<br>TAG    |                                                                          |
| U6               | CTCGCTTCGGCAG<br>CACA                     | AACGCT<br>TCACGAATTTGCG<br>T      |                                                                          |
| mBS1             | GGTGGTGTAATAG<br>AATTA<br>GGAAAATAAGT     | CTAAAAATATACT<br>ACCAACCCCC       |                                                                          |
| mBS2             | GG<br>TGGTGTAATAGAA<br>TTAGGAAAATAAG<br>T | AAAATATACTAC<br>CAACCC<br>CC      |                                                                          |
| mBS3             | GGTGTAATAGAAT<br>TAGGAAAATAAGT<br>T       | AAATCTTC<br>ATCTACCTCCCAA<br>AAA  |                                                                          |
| mBS4             | GGTGTAATAGAAT<br>TAGGAAAATAAGT<br>T       | AAAATAAAAATA<br>TACTACCAACCC<br>C |                                                                          |
| mBS5             | GGTGGTGTA<br>ATAGAATTAGGAA<br>AATAAGT     | TAAAAATATACTA<br>CCAACCCCC        |                                                                          |



### **Reagents of primary RGCs isolation**

D-lysine (Sigma P6407);

laminin (Sigma L-6274);

Thy1.2 antibody (SIGMA M7898);

papain solution papain solution (Solarbio G8430), 2 mg L-cysteine (Sigma C-2529), 100  $\mu$ l 0.4% DNase (Sigma D-4527) in 10 ml DPBS);

Lo Ovomucoid (including 600 mg BSA, 600 mg Trypsin inhibitor (ROCHE 4693159001) in 40 ml DPBS);

Rabbit anti-mouse microphage antibody (Accurate chemical AIA31240);

panning buffer (Add 2 ml DPBS/0.2% BSA to 18 ml DPBS. Add 200  $\mu$ l insulin and 120  $\mu$ g

N-acetyl cysteine and 10ul Neurobasal);

RGC growth media (mainly containing Pen/Strep, insulin, sodium pyruvate, T3, L-glutamine, B27, BDNF, CNTF, Forskolin and bFGF, etc.)

### **Positive cells analysis in retina sections and whole-mount**

For quantification, 10 randomly selected fields were observed in each section to count the TUNEL positive RGCs normalized to total nuclei in ganglion cell layer, 4 central retina slices were analyzed per animal. We quantified the number of cells in the ganglion cell layer (GCL) (in a blinded manner). The Statistician did not know the grouping condition of these retina samples. Images of retinal whole mounts were photographed from 2 different regions at the distance of 1 and 2 mm to the disc of each quadrant of the retina using a microscope of LEICA DMI3000B equipped with fluorescence illumination (Weztlar, Germany). Images were captured at a 20-fold magnification. Mean count of survival RGCs normalized to MBD2-WT/Sham group in 4 different groups. 8 regions were captured per retina for analyzing.
